# Supplementary material
Source: publisher figshare collection journal article supplement (https://acs.figshare.com/ndownloader/files/5056369)
Supplement: Supplementary file 1 [file 5056369]

# Supporting Information

## Novel Aluminum phosphinate and phosphates of Salen ligands

*Amitabha Mitra, Sean Parkin and David A. Atwood*

Department of Chemistry, University of Kentucky, Lexington, KY 40506-0055

E-mail: datwood@uky.edu

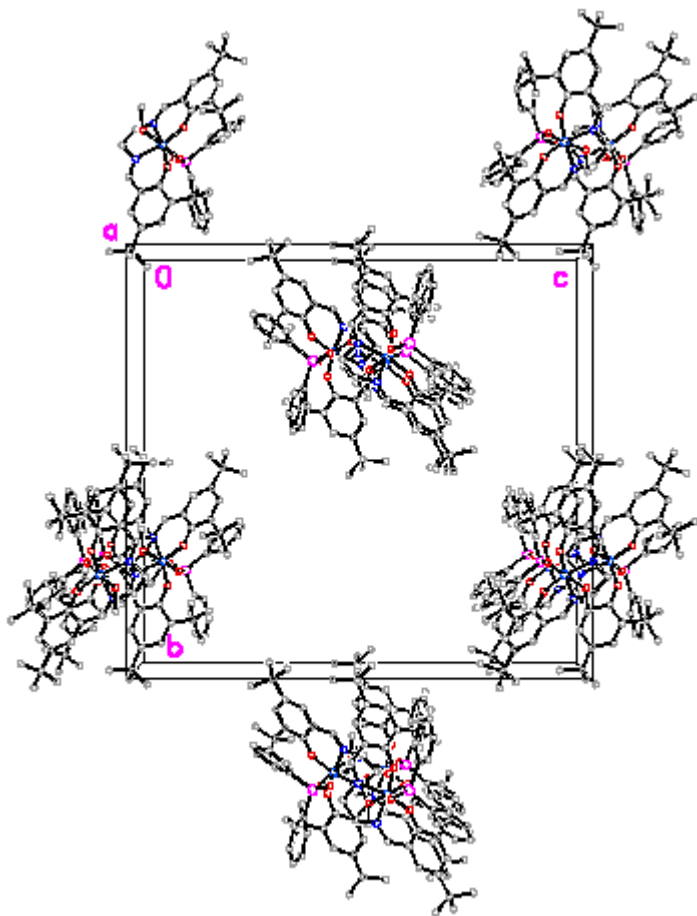

**Figure S1.** Packing diagram of **1•MeOH** viewed down the *a*- axis.

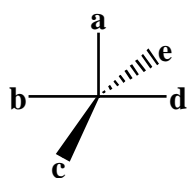

**Figure S2.**  $\tau$  diagram.  $\alpha$  ( $c - e$ ) and  $\beta$  ( $b - d$ ) are the angles opposite to each other in the *xy* plane where *a* is along the *z*-axis. By convention  $\beta$  is the most obtuse angle.

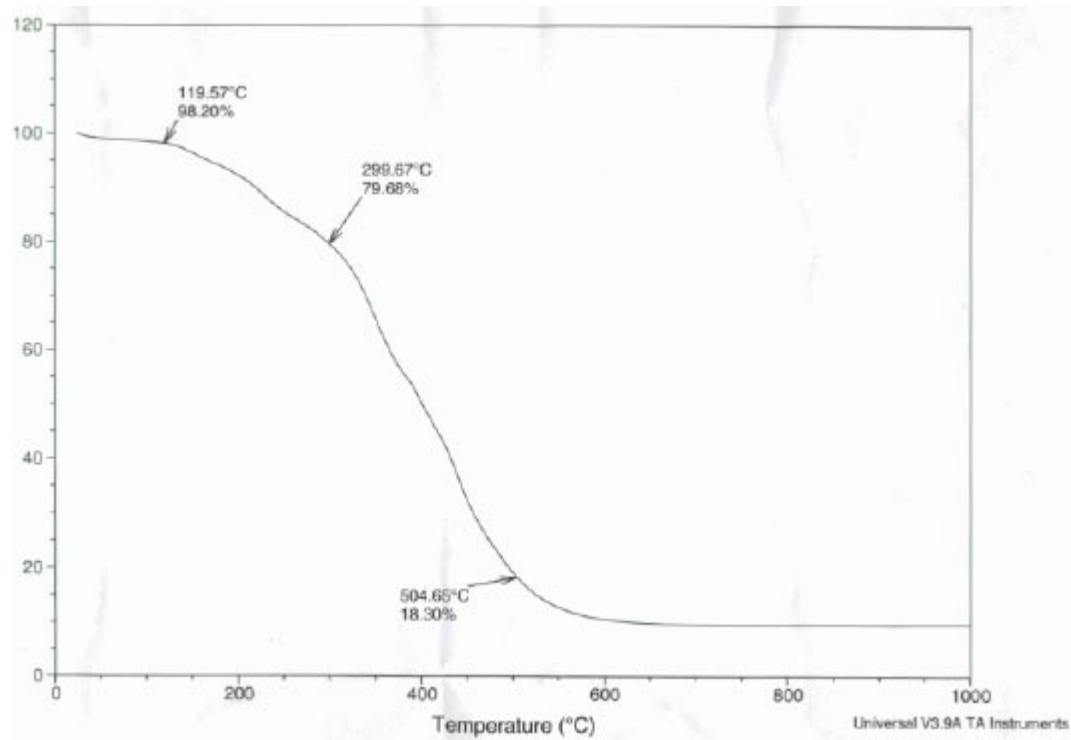

**Figure S3.** TGA of compound **3**

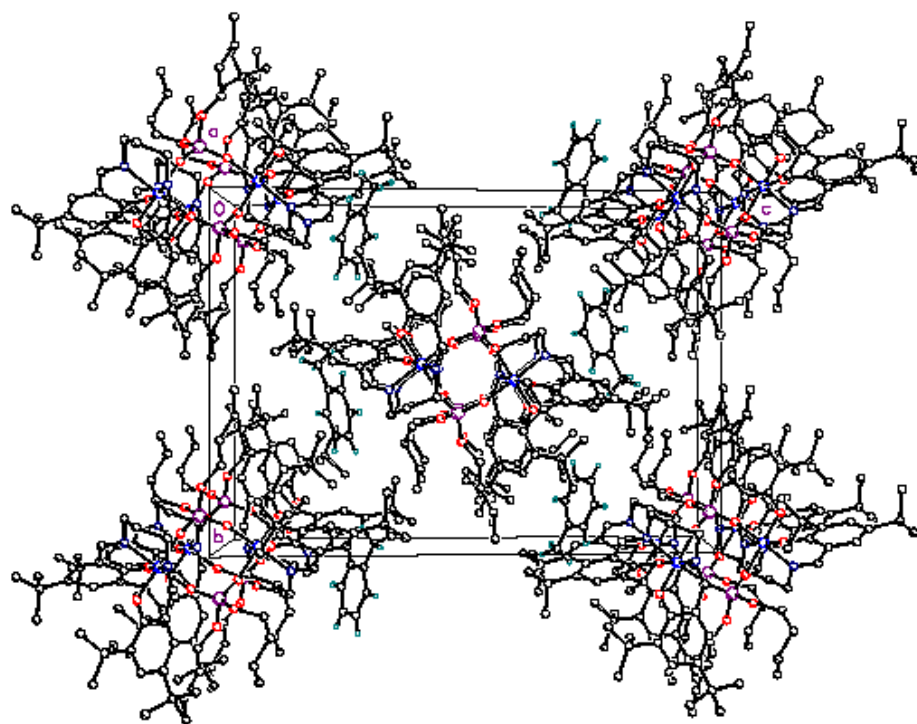

**Figure S4.** Packing diagram of **3** viewed down the *a*-axis

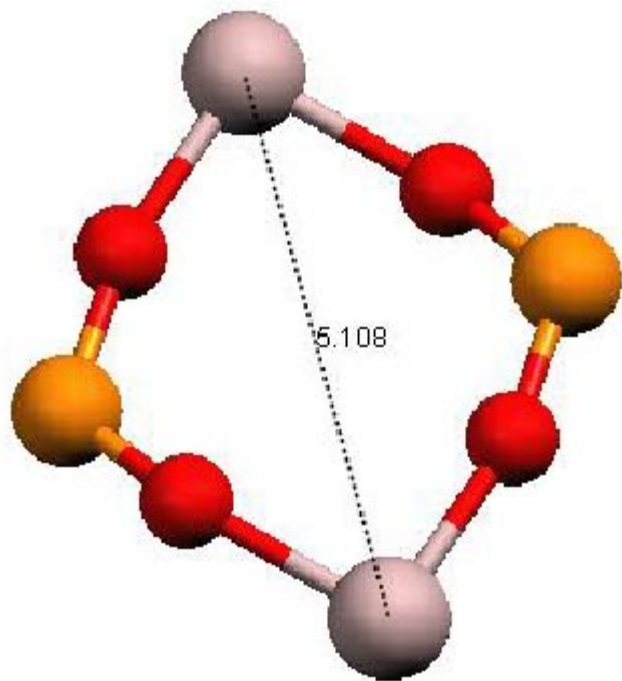

**Figure S5.** Al-O-P ring showing Al-Al distance.
